# Supplementary material for: Finding coevolving amino acid residues using row and column weighting of mutual information and multi-dimensional amino acid representation
Source: Springer Nature journal article supplement (doi:10.1186/1748-7188-2-12), 2007-10-03

**Fraction of True Positives by rate of evolution**

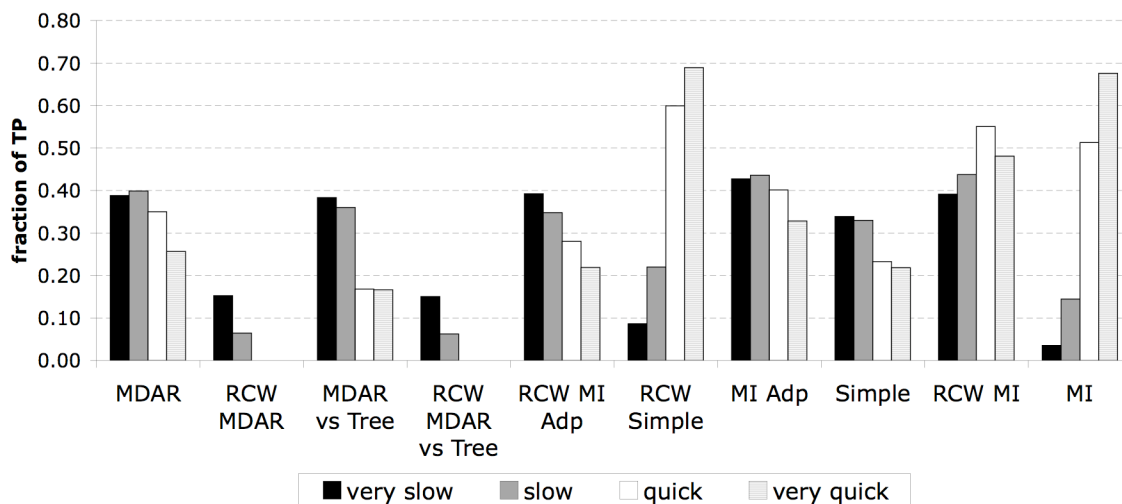

Supplement: 13015_2007_37_MOESM8_ESM.pdf [file 13015_2007_37_MOESM8_ESM.pdf]
